# Supplementary material for: Dextran 500 Improves Recovery of Inflammatory Markers: An In Vitro Microdialysis Study
Source: PubMed Central journal article supplement (PMC6921287; doi:10.1089/neu.2019.6513), 2019-12-11

**SUPPLEMENTARY FIG. S1.** Absolute recovery data for all included cytokines/chemokines. Y-axis shows mean cytokine concentration (pg/ml) with standard error of mean as error bars and x-axis time (hours).

**BAFF**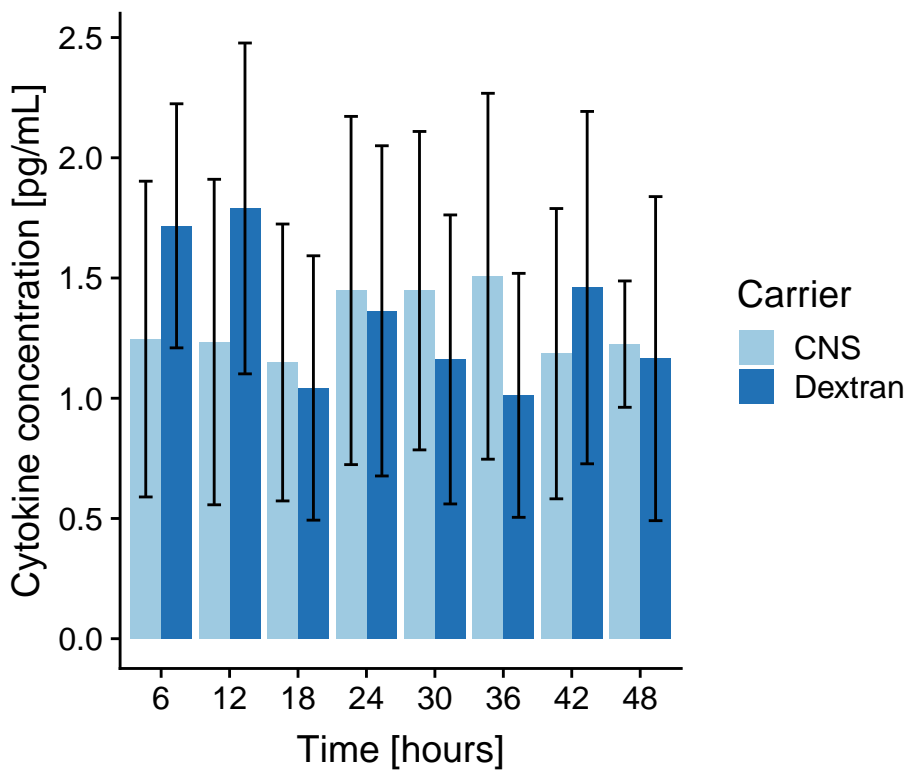**BDNF**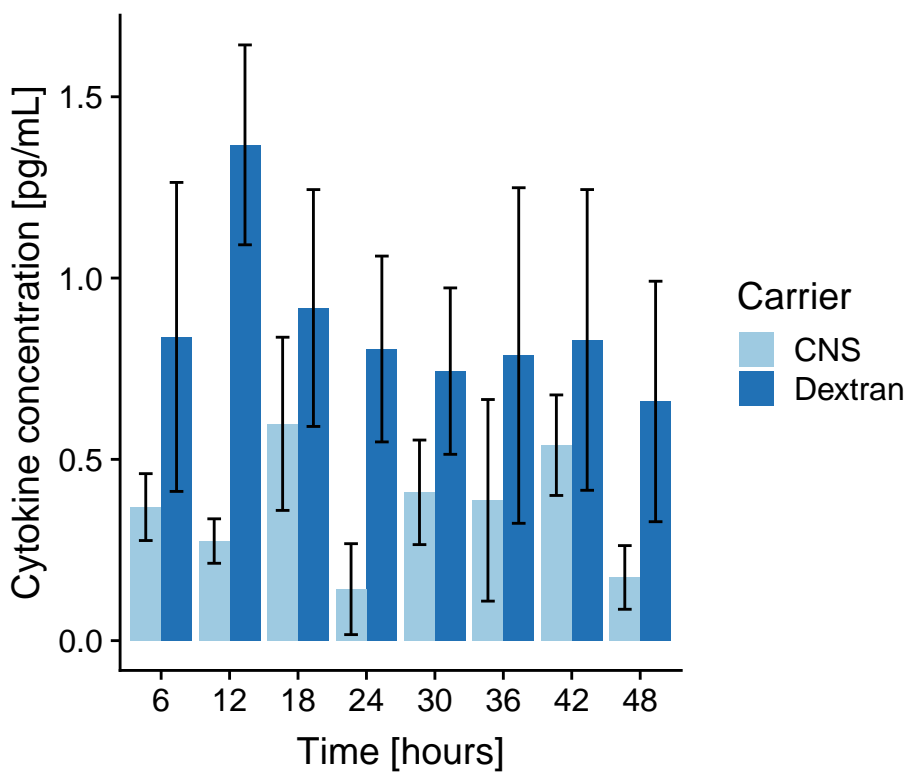**BLC/CXCL13**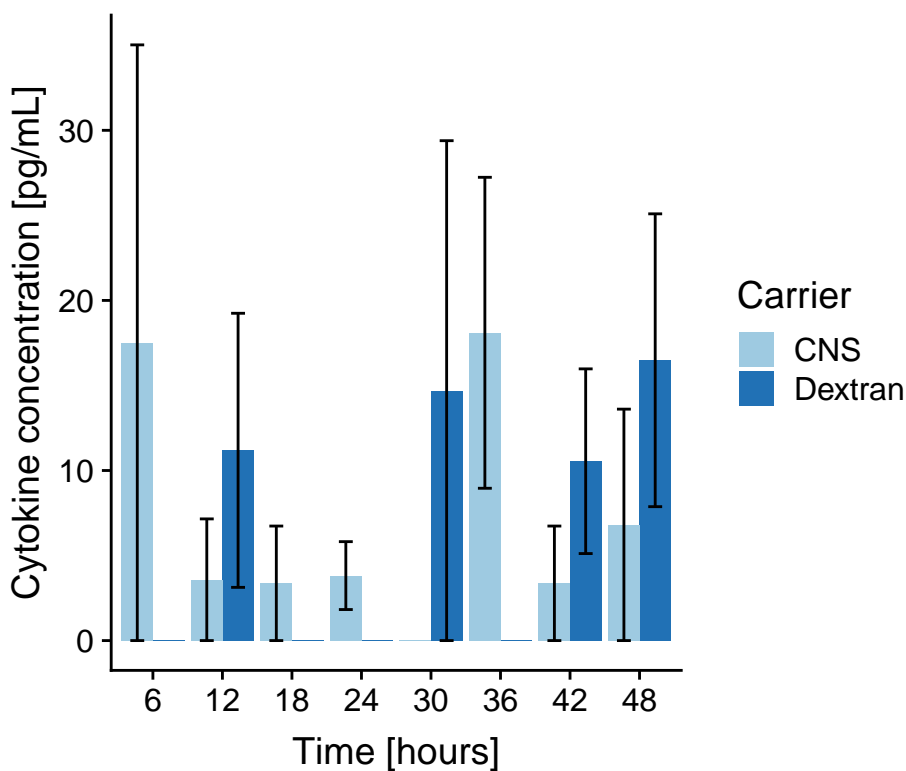

**CCL20/MIP-3a**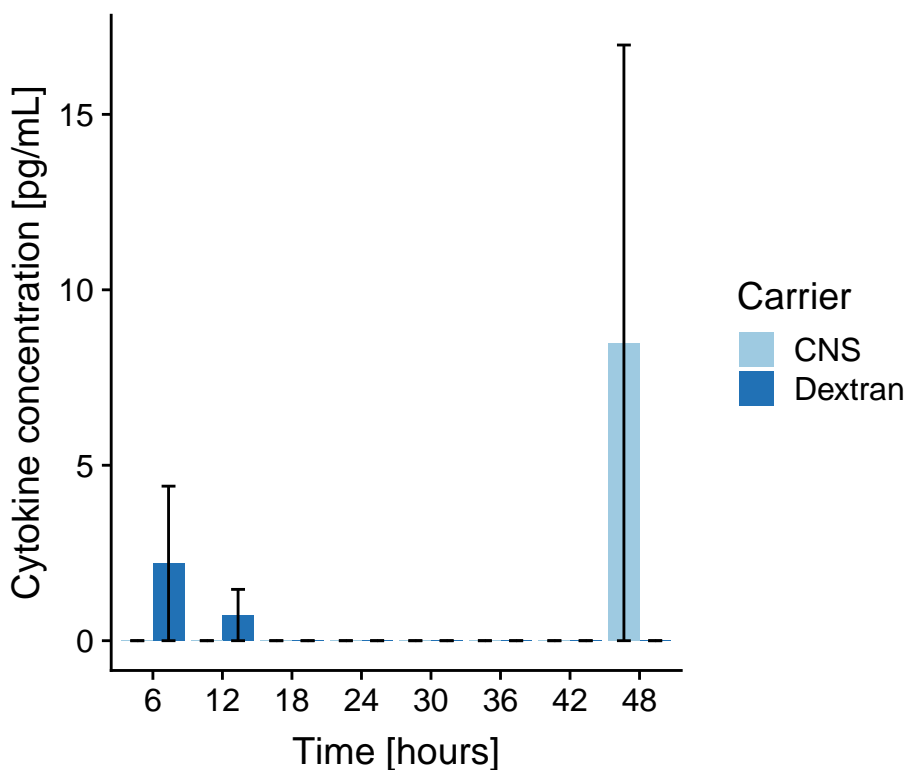**CCL3/MIP-1a**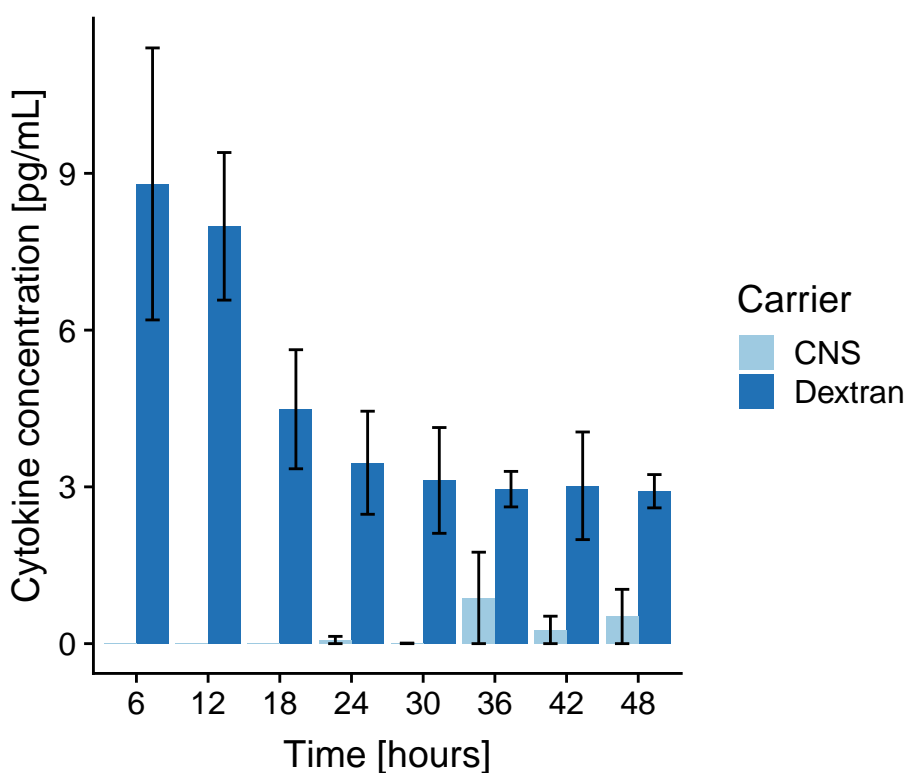**CCL4/MIP-1b**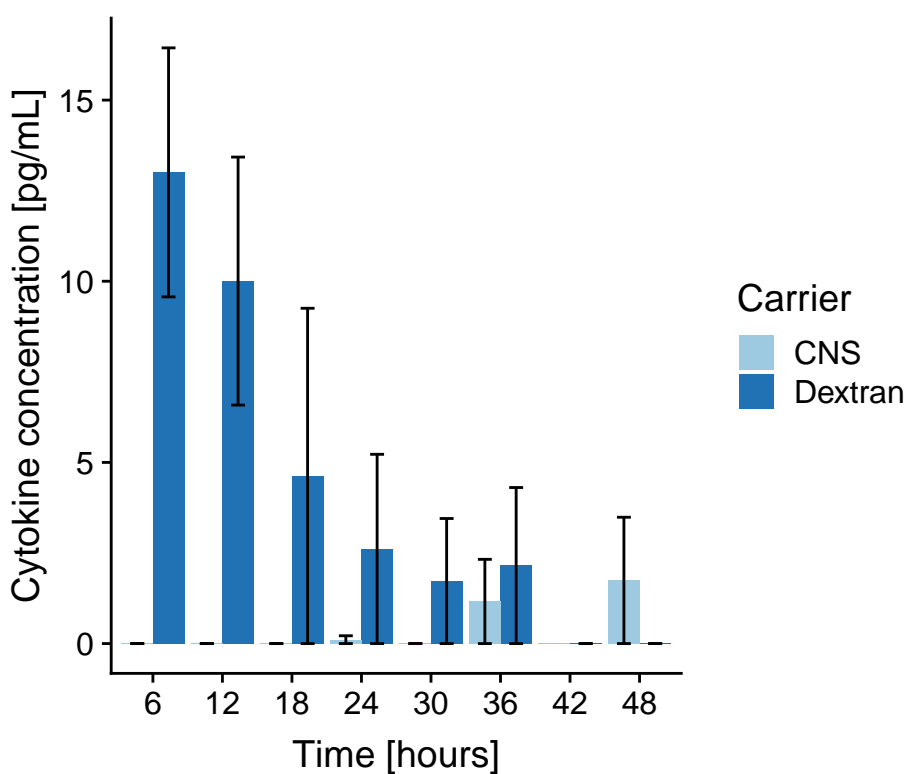

**Eotaxin**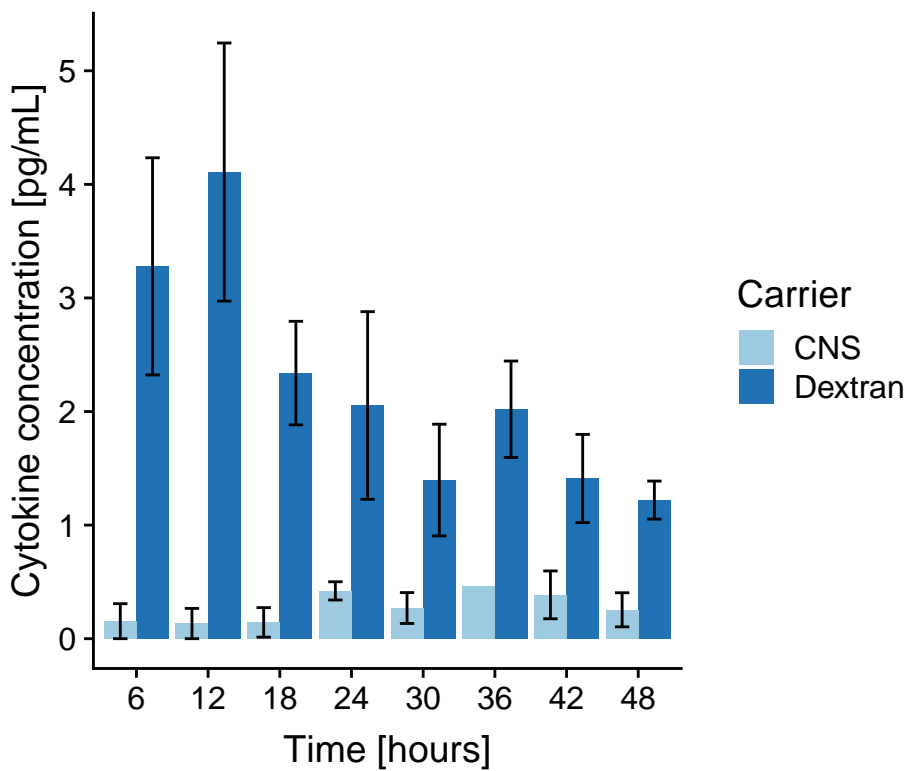**Fractalkine**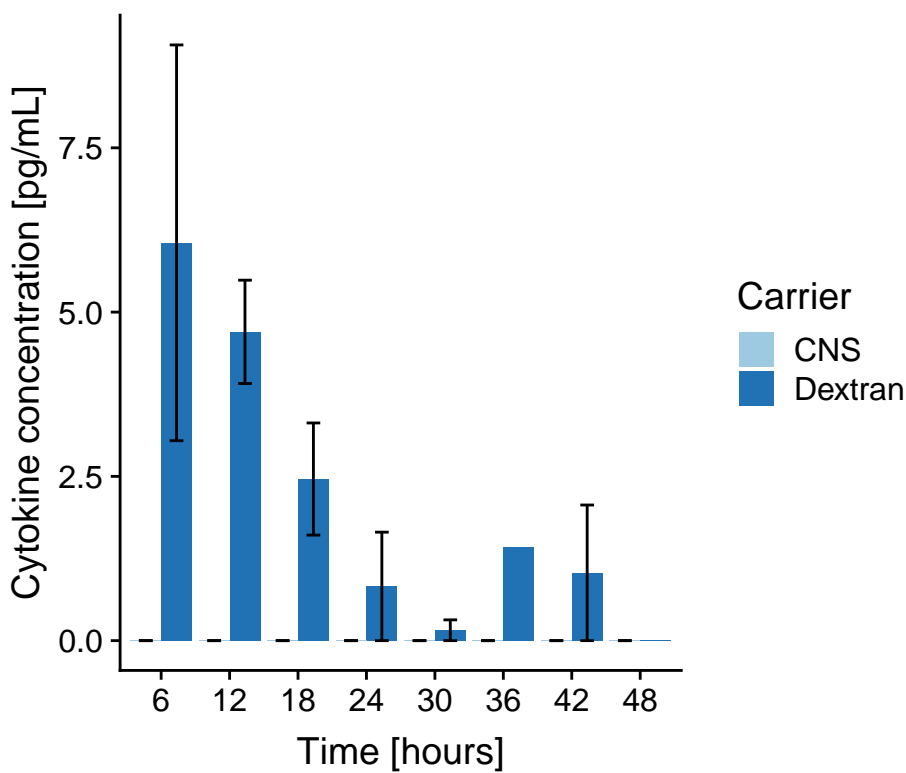**G-CSF**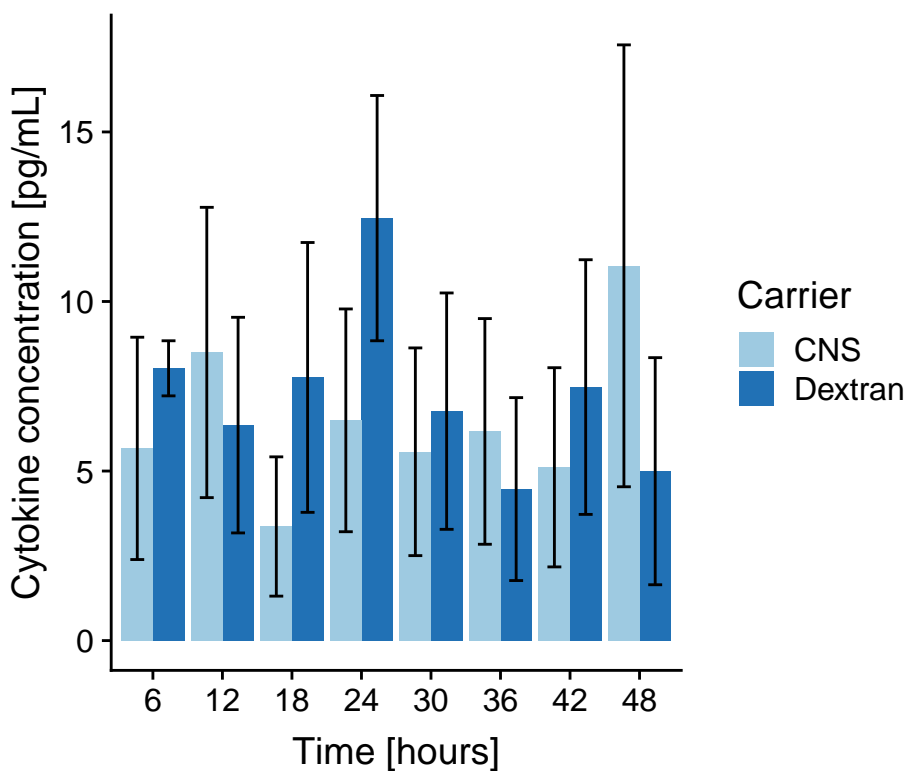

**Galectin-3**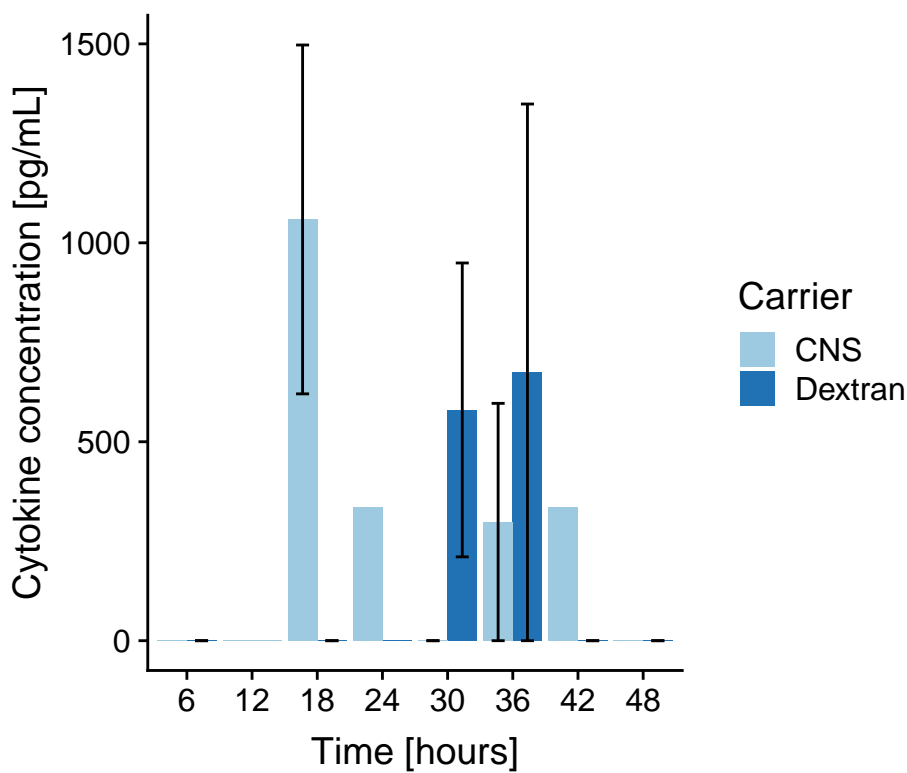**GRO-alpha**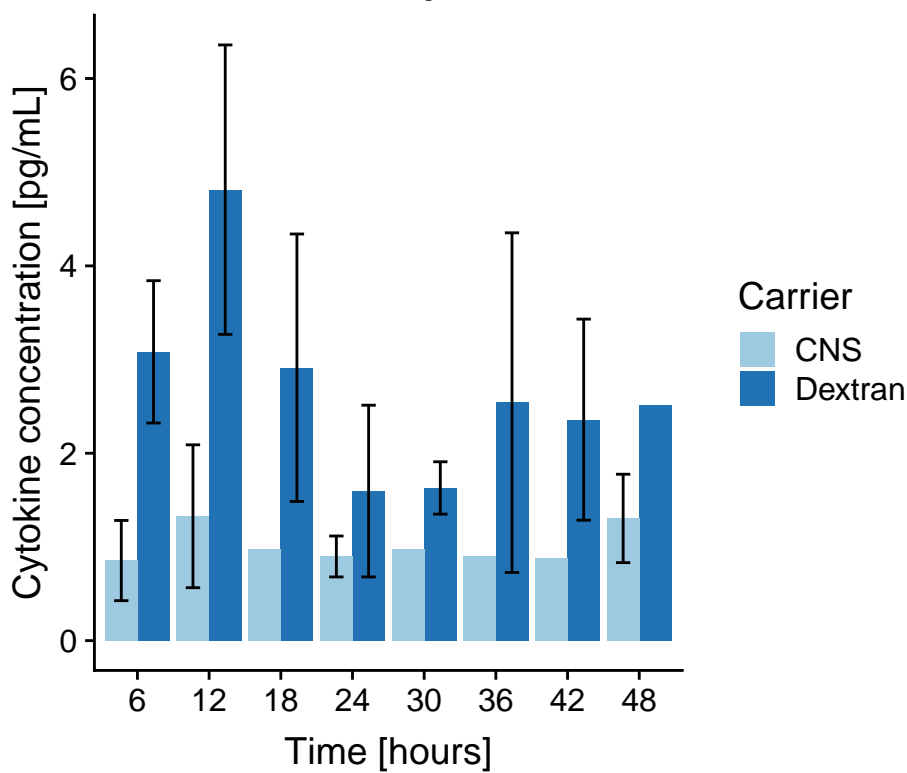**IFN-alpha**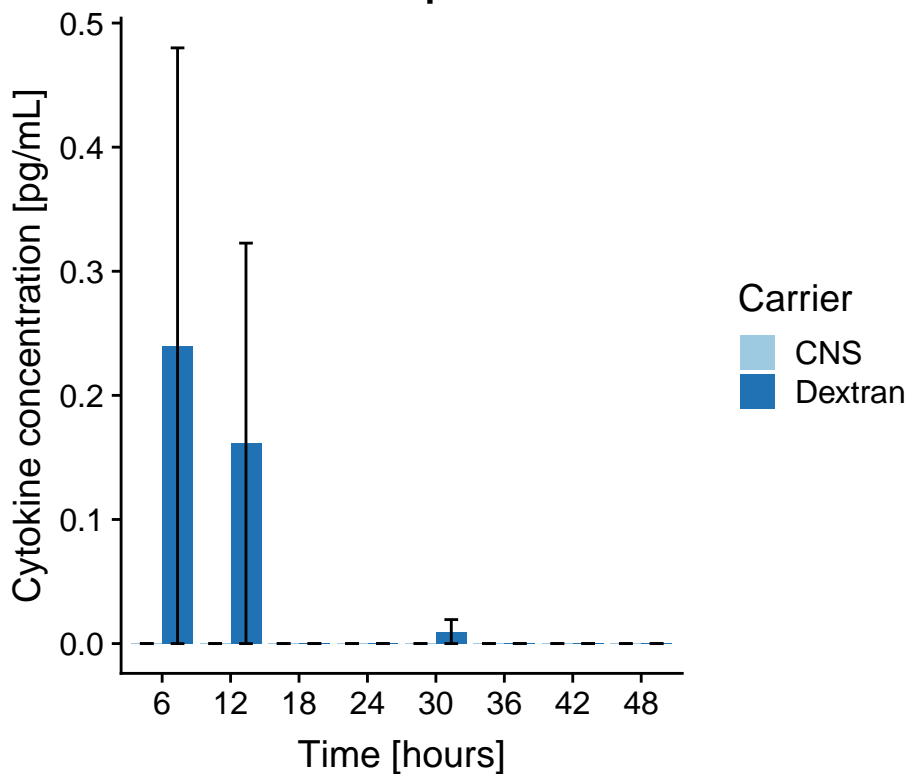

**IFN- $\gamma$** 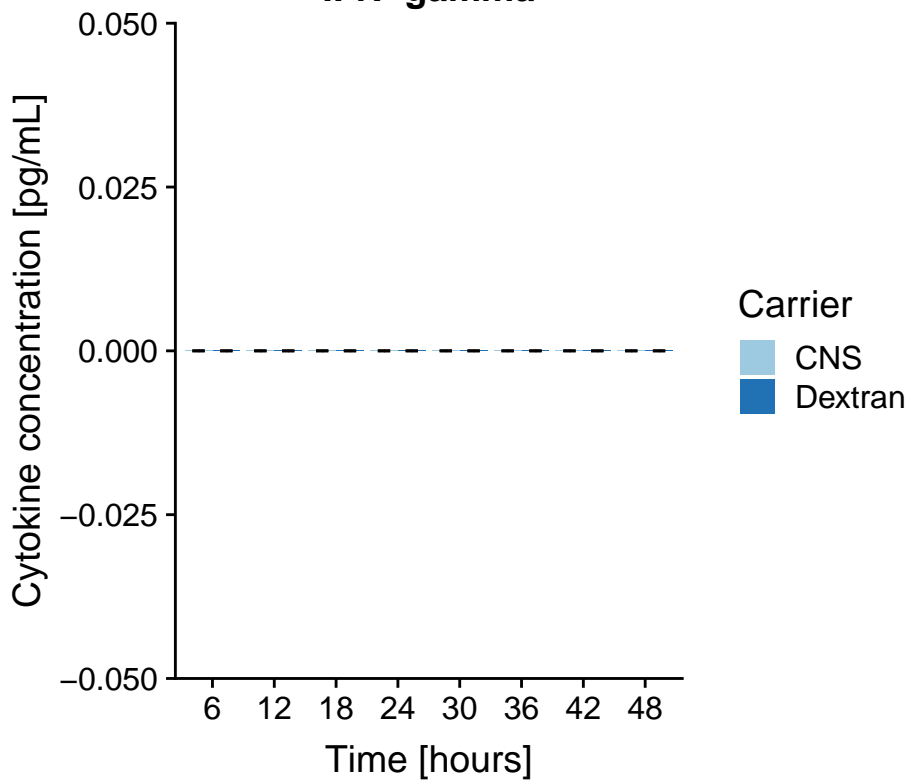**IL-10**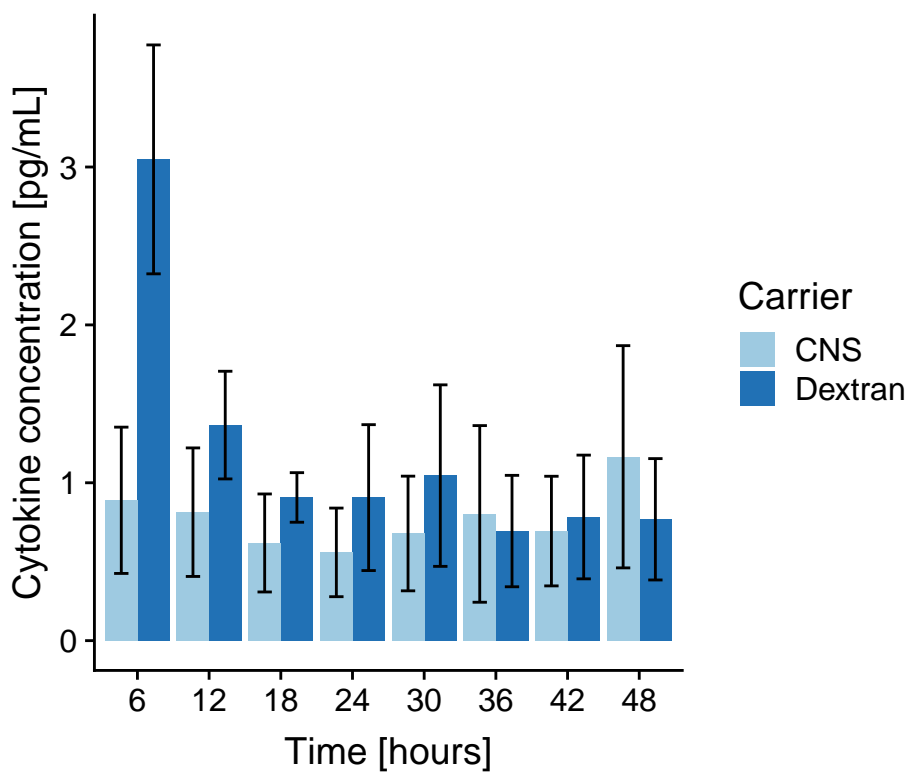**IL-12p70**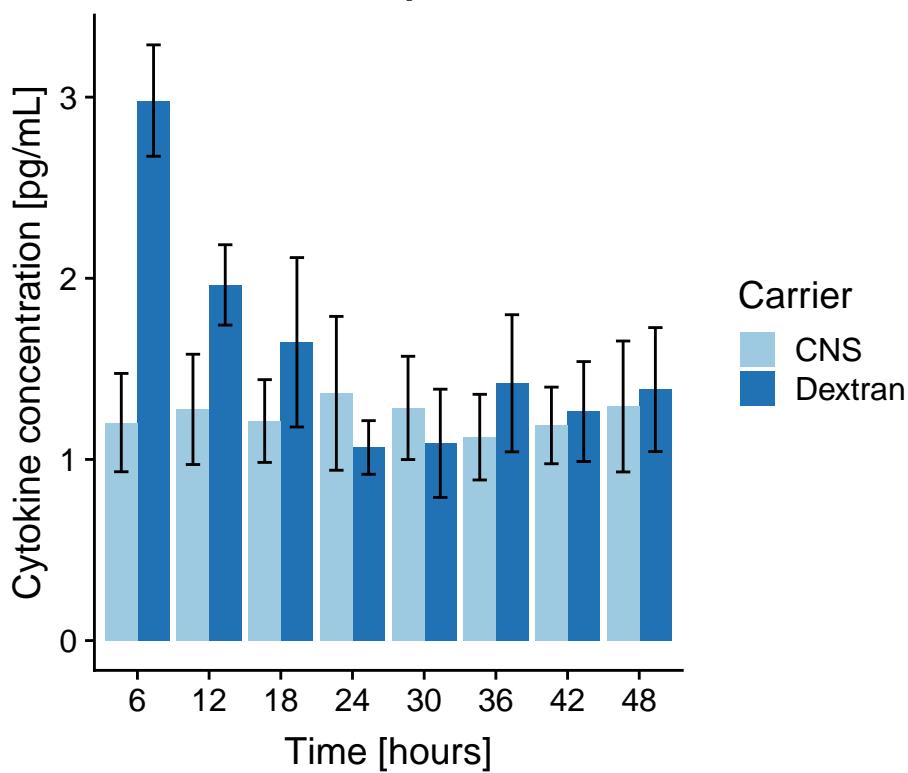

**IL-17A**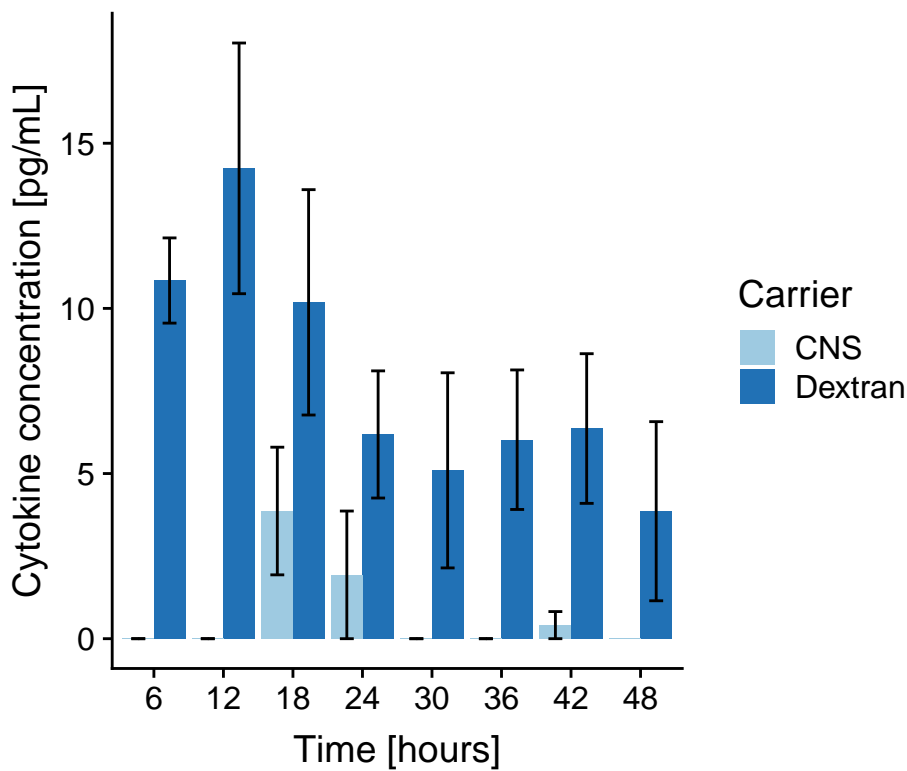**IL-1alpha**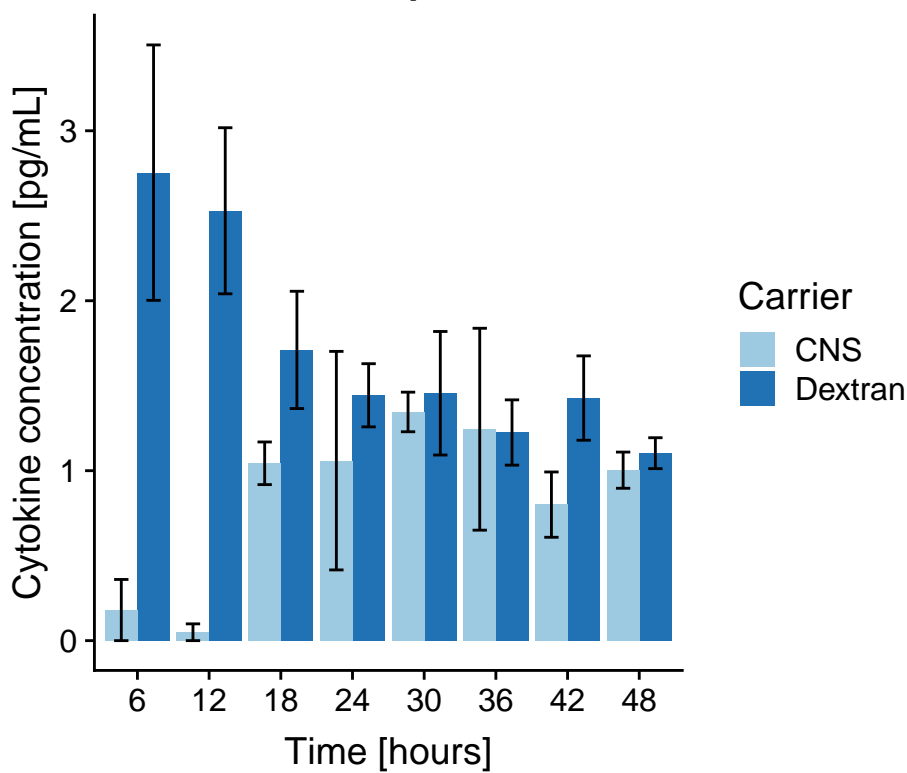**IL-1beta**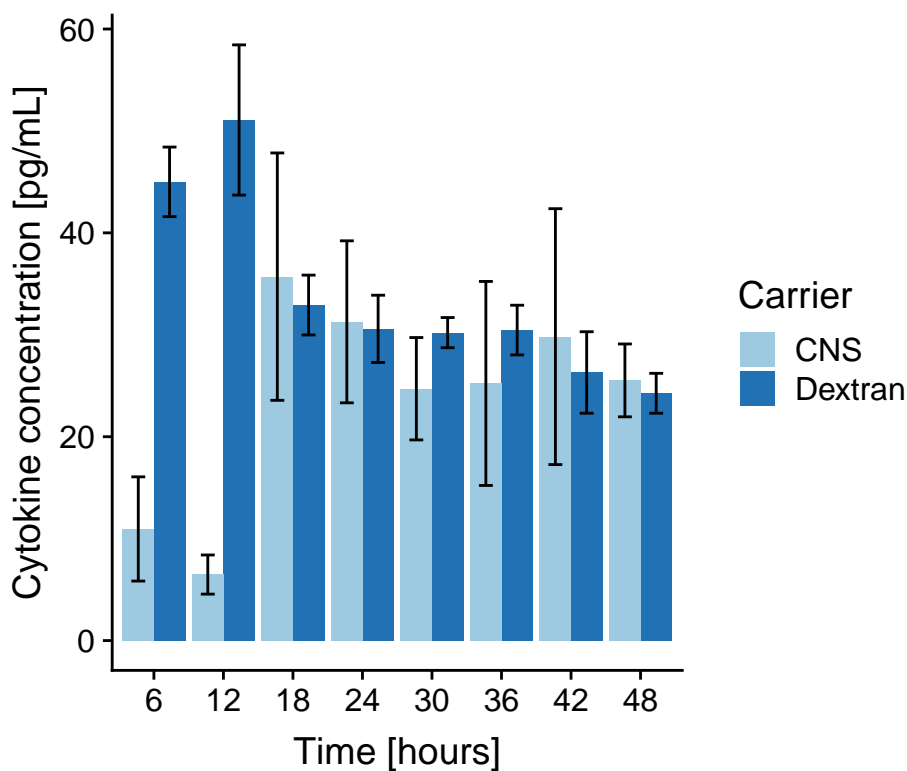

**IL-1RA**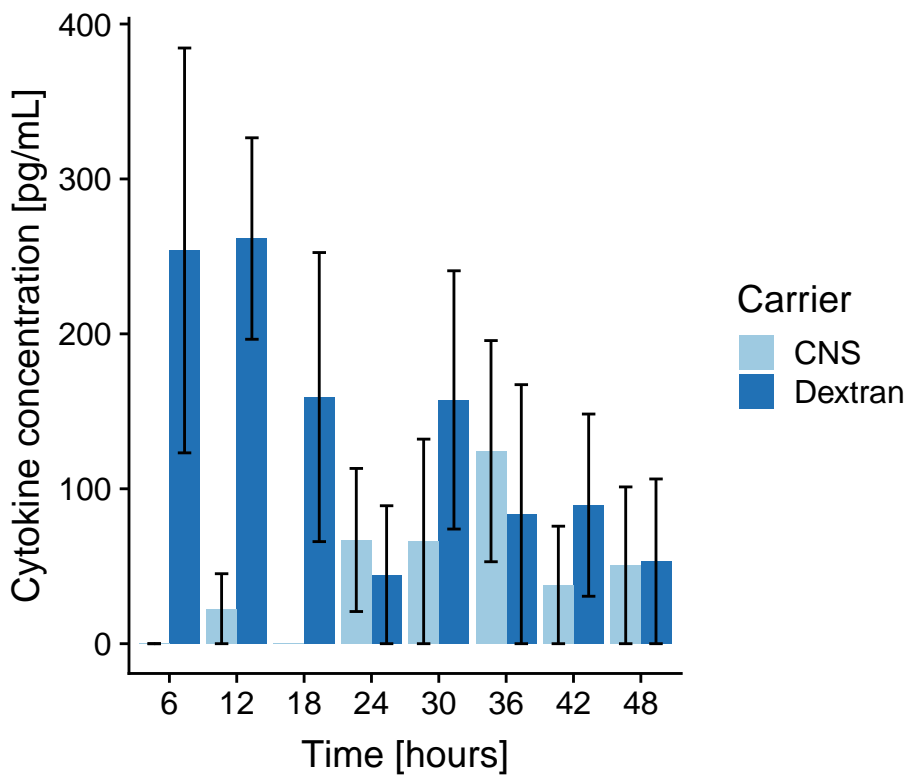**IL-23**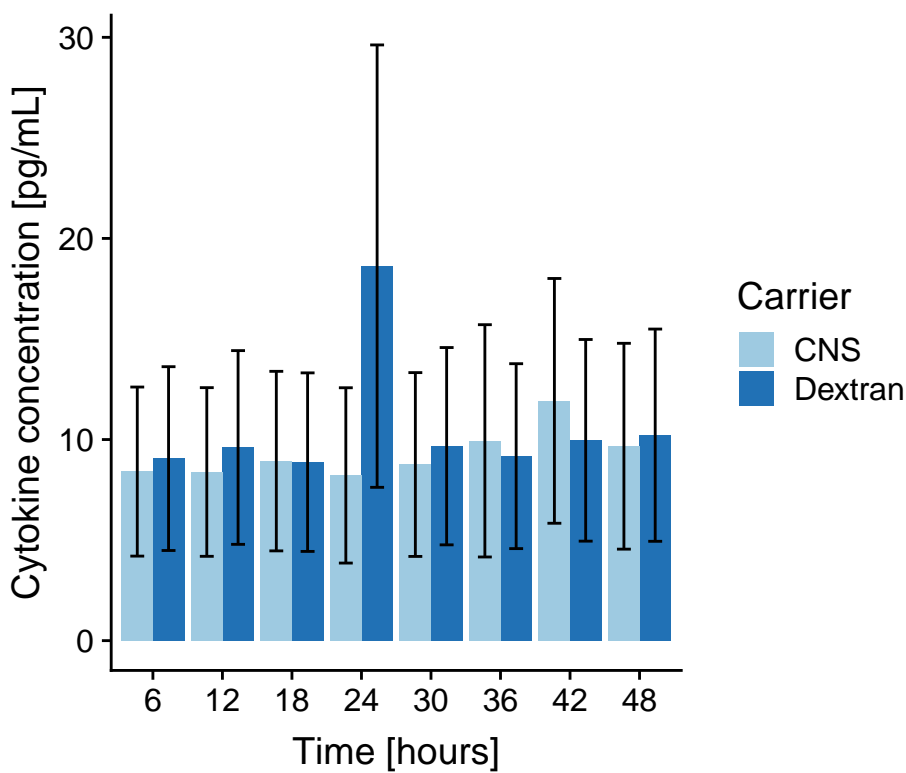**IL-4**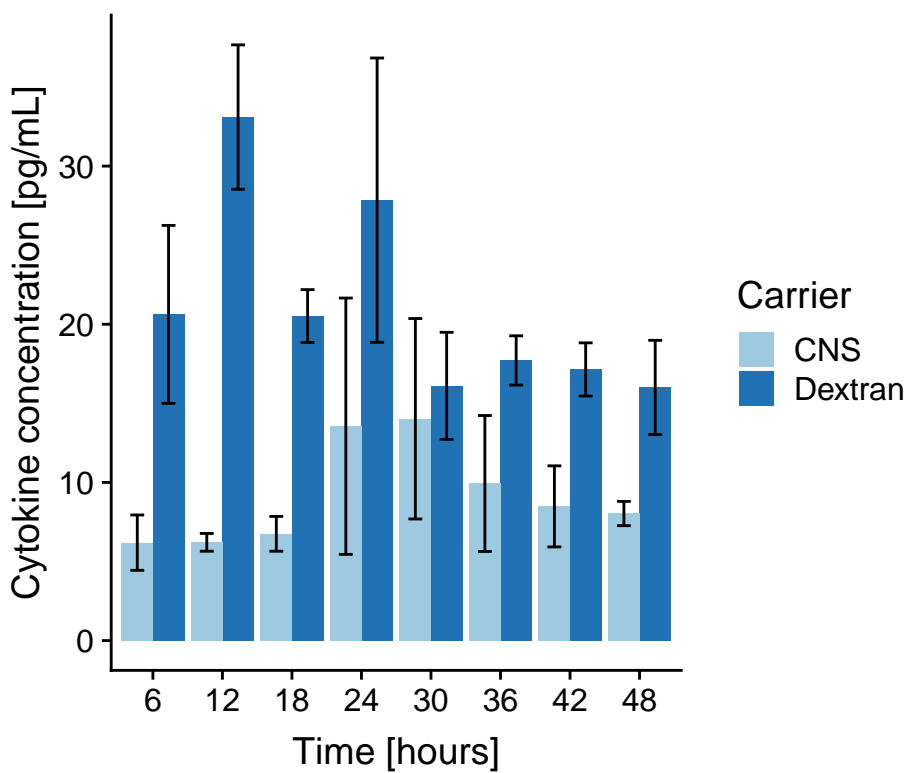



**IL-6**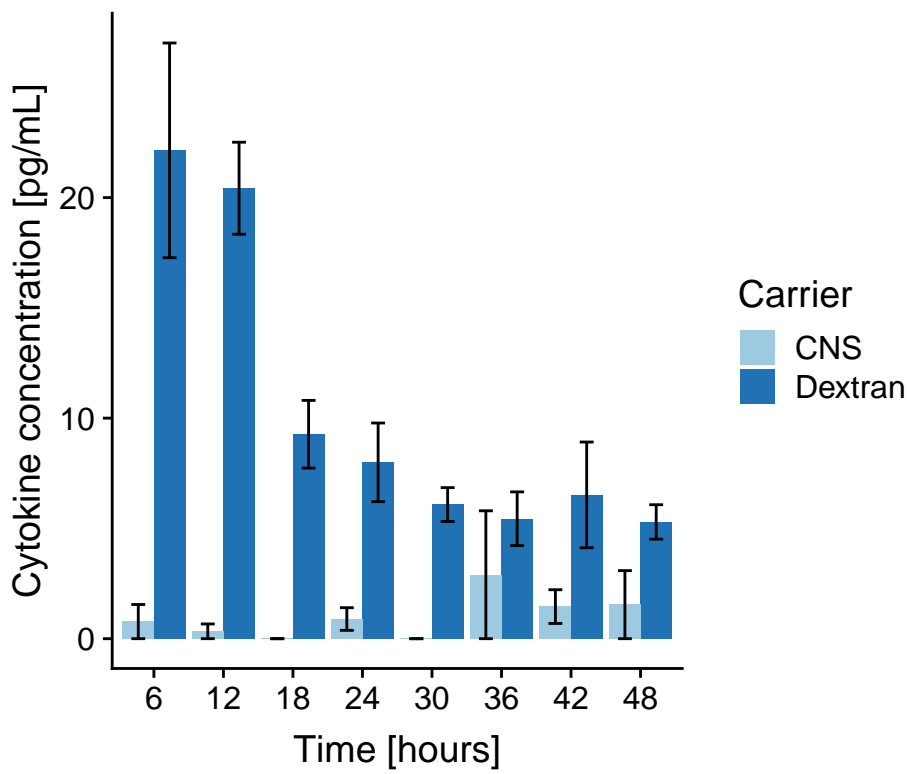**IL-8**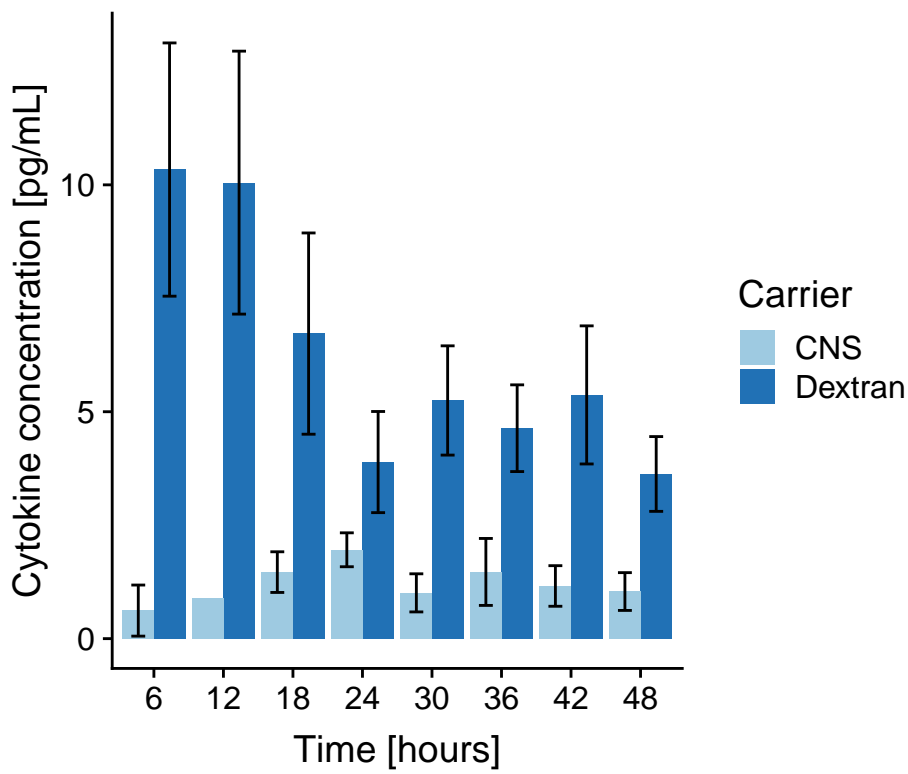**IP-10**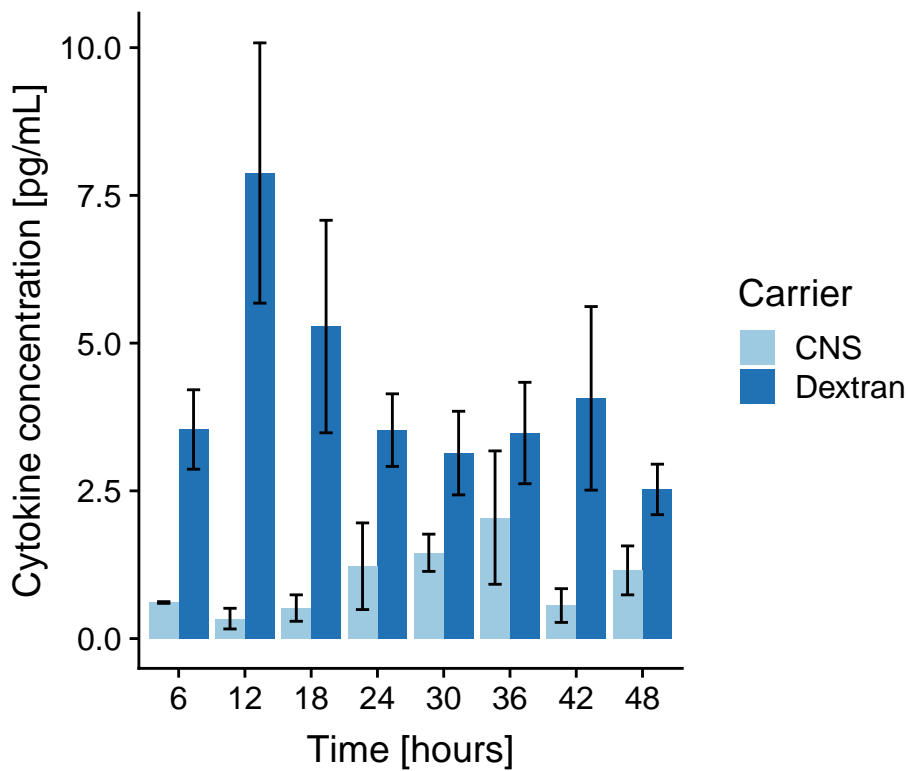

**M-CSF**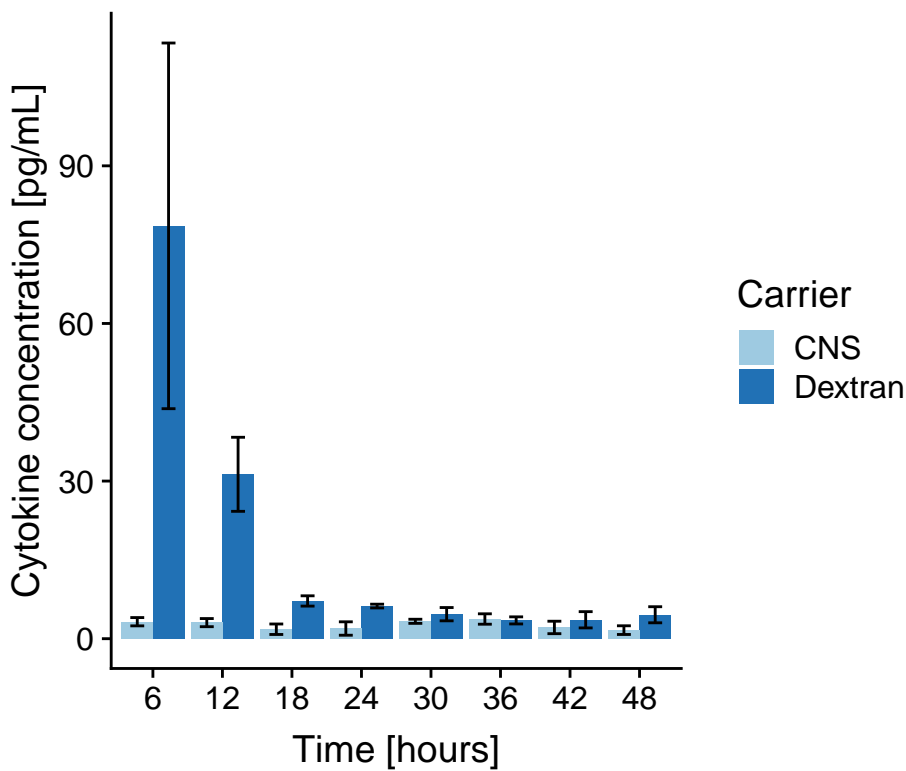**MCP-1**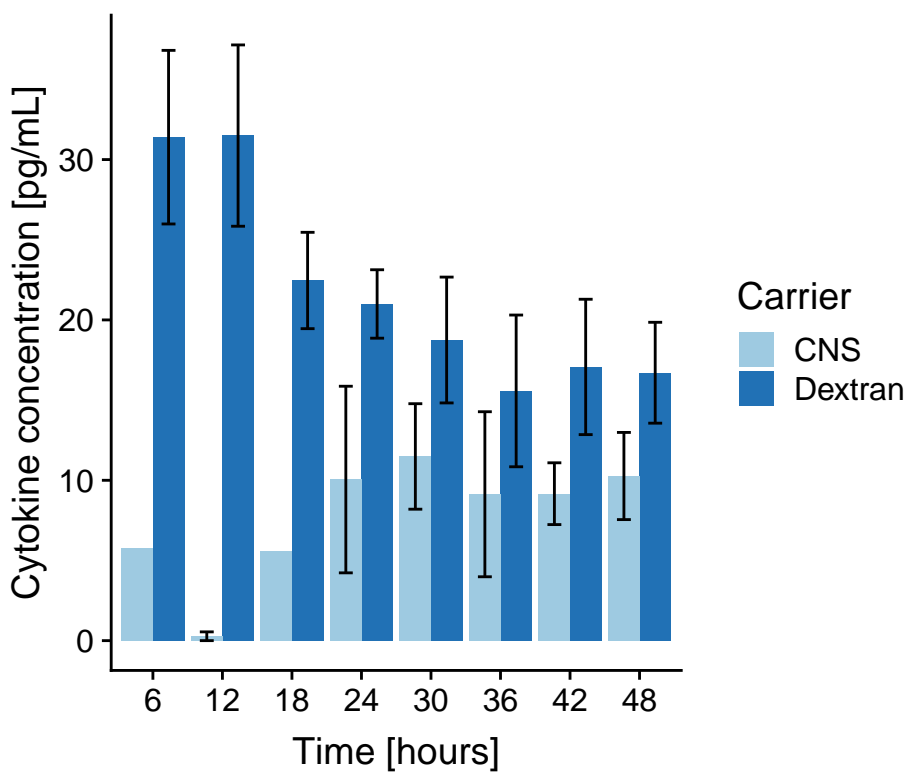**MCP-2/CCL8**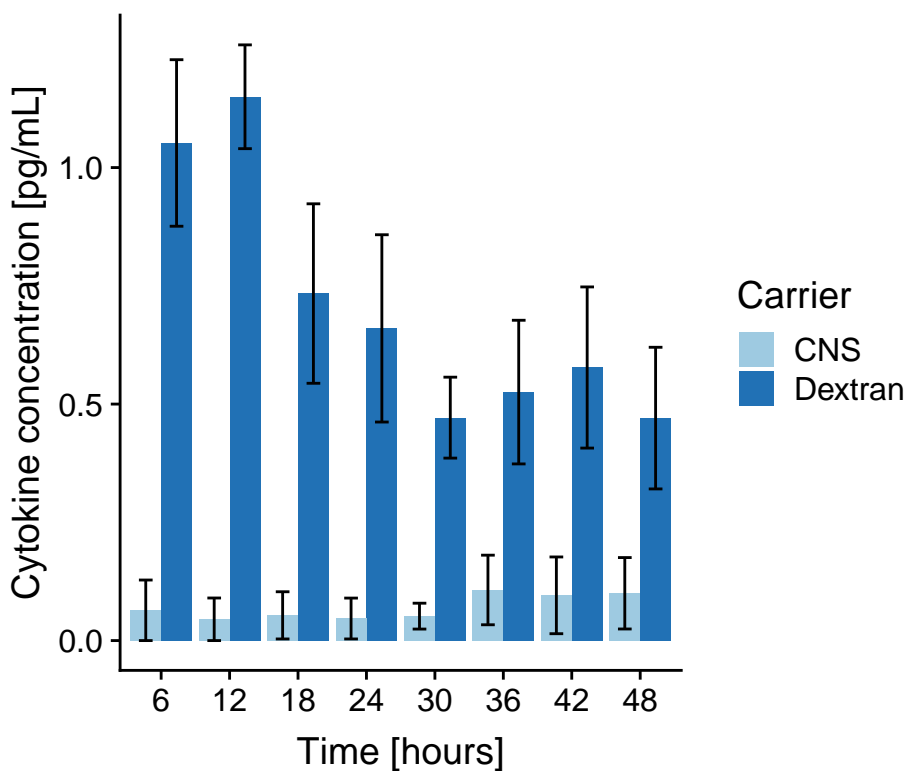

**MCP-3**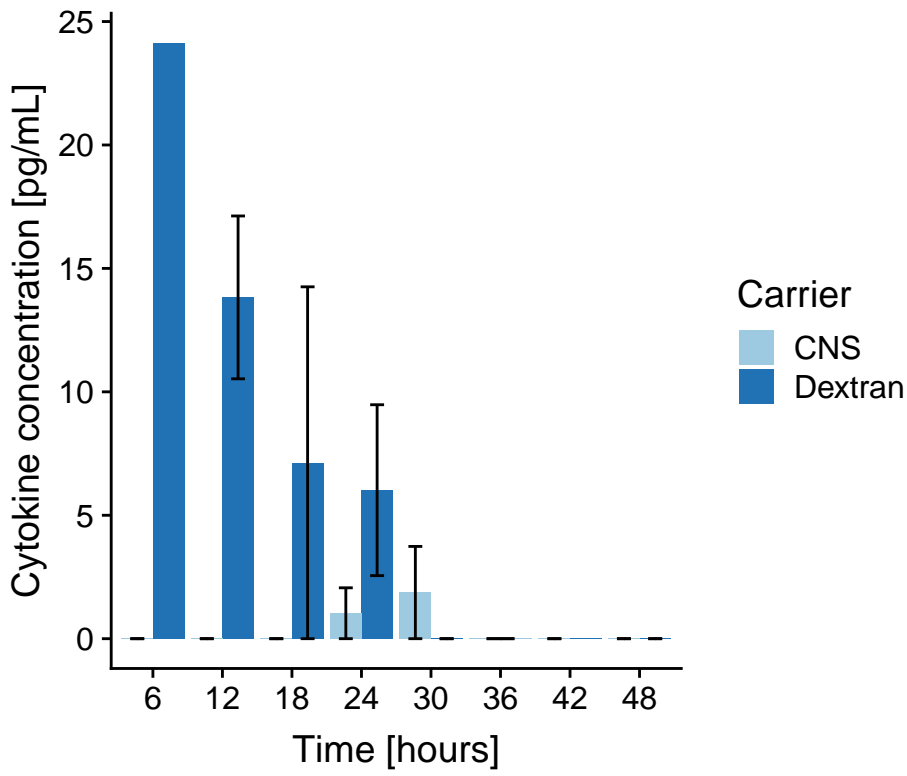**MDC/CCL22**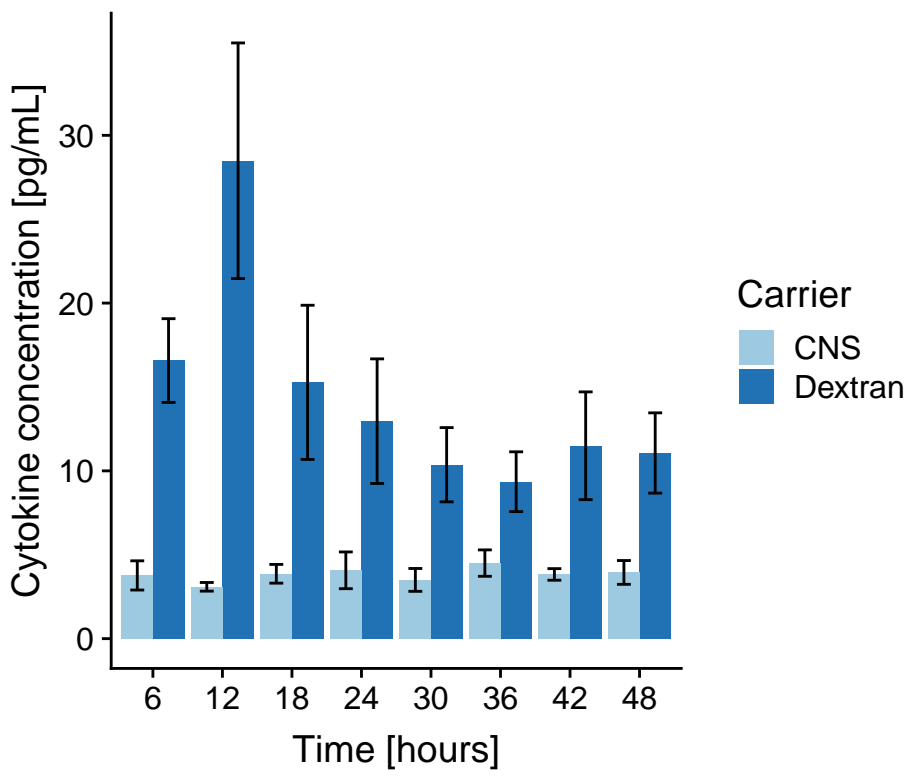**MMP-2**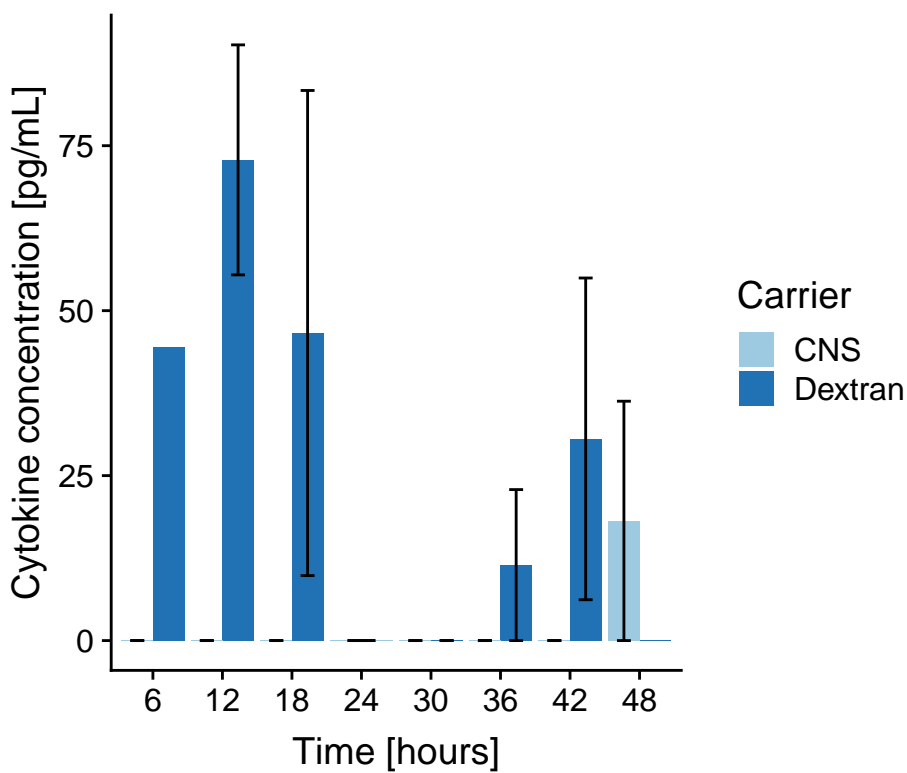

**MMP-9**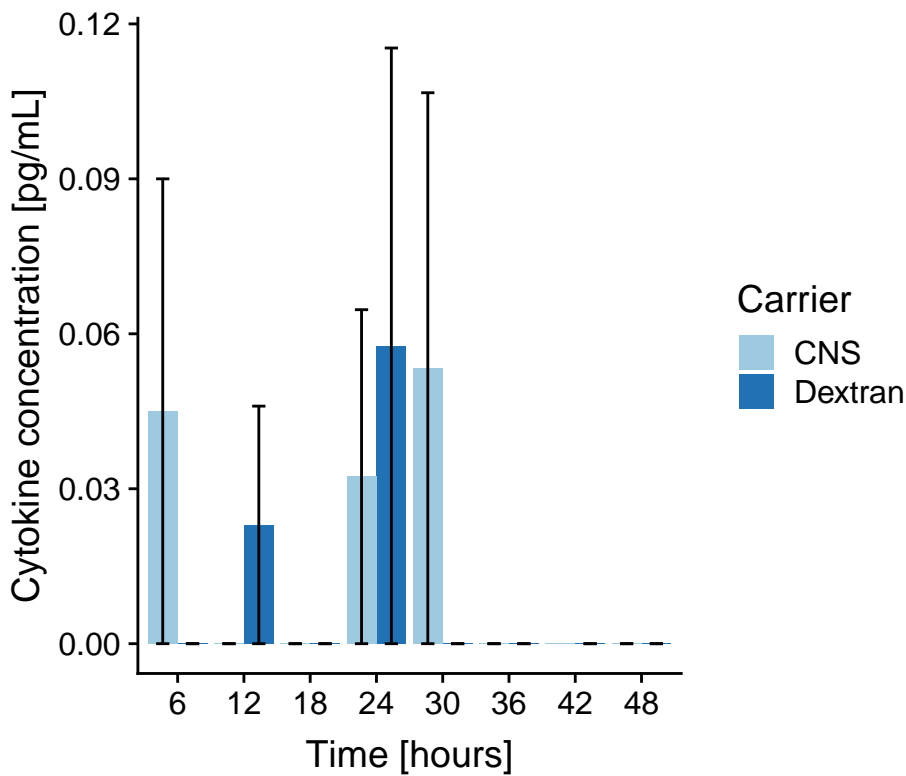**RANTES**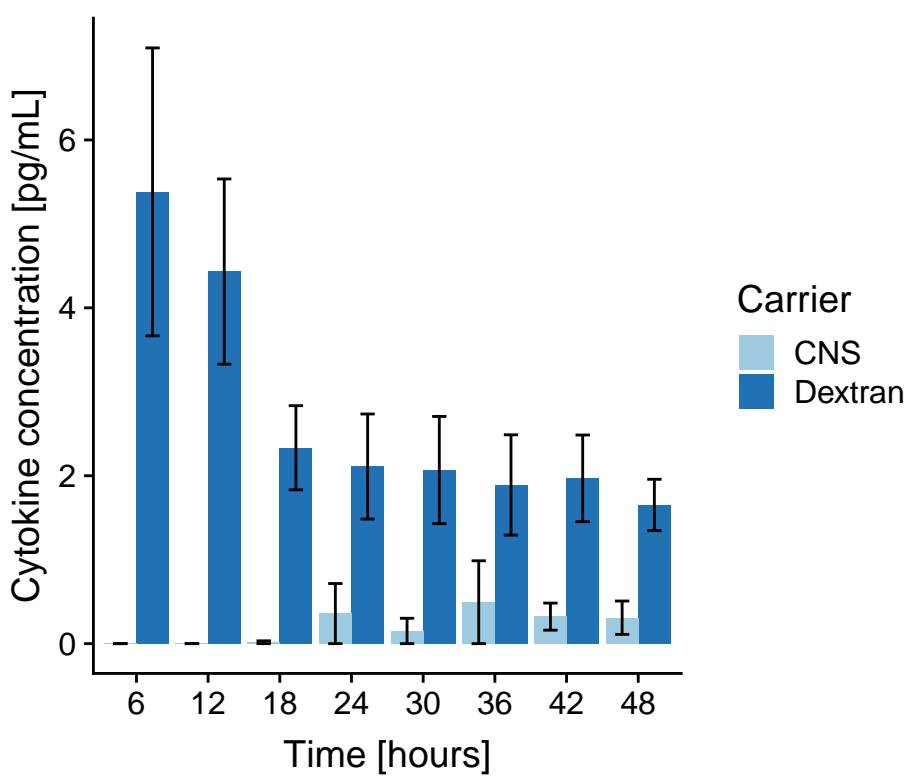**sCD40L**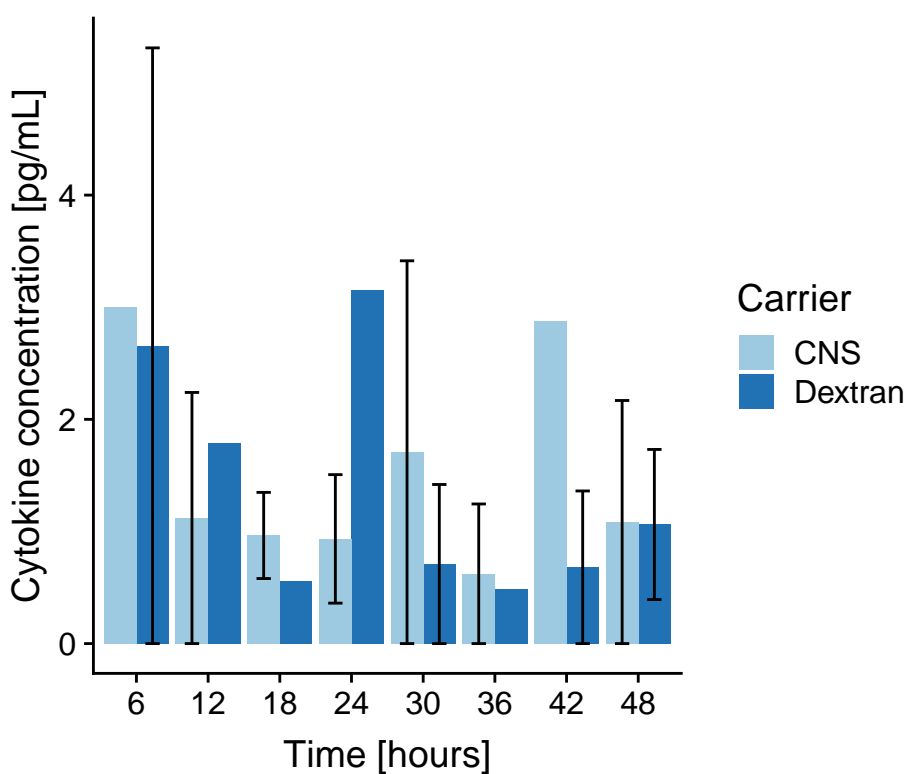

**TGF- $\alpha$** 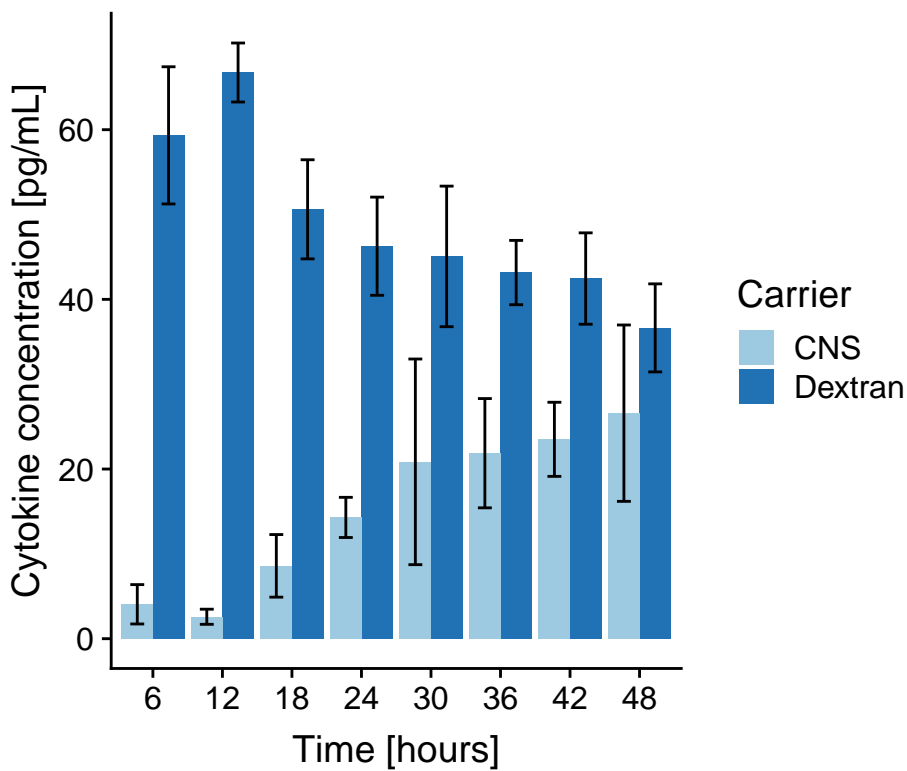**TIMP-1**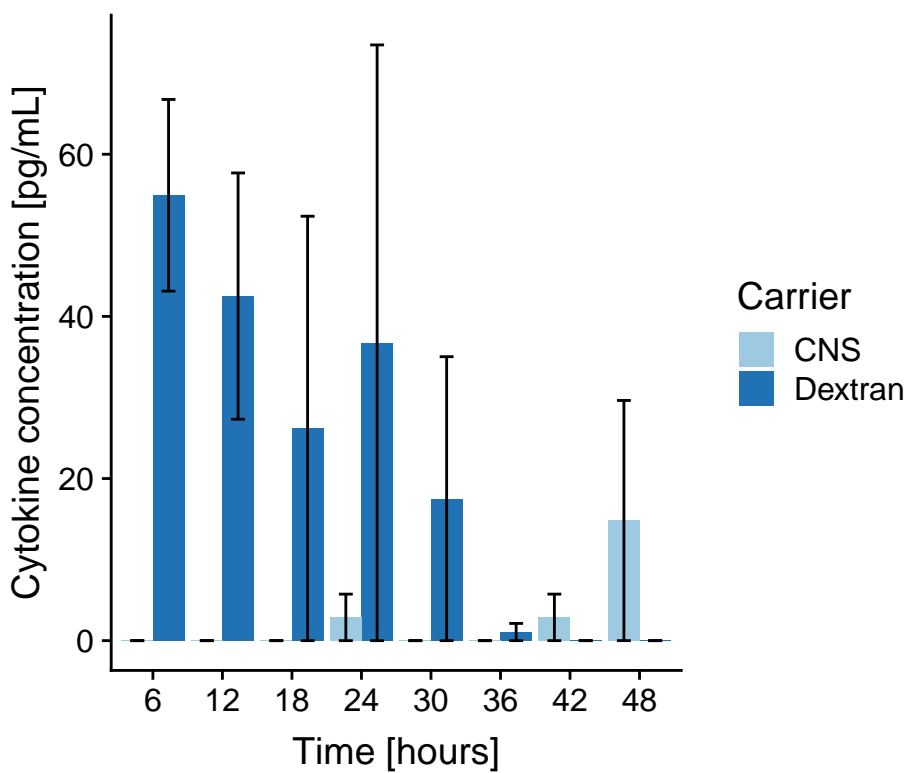**TNF- $\alpha$** 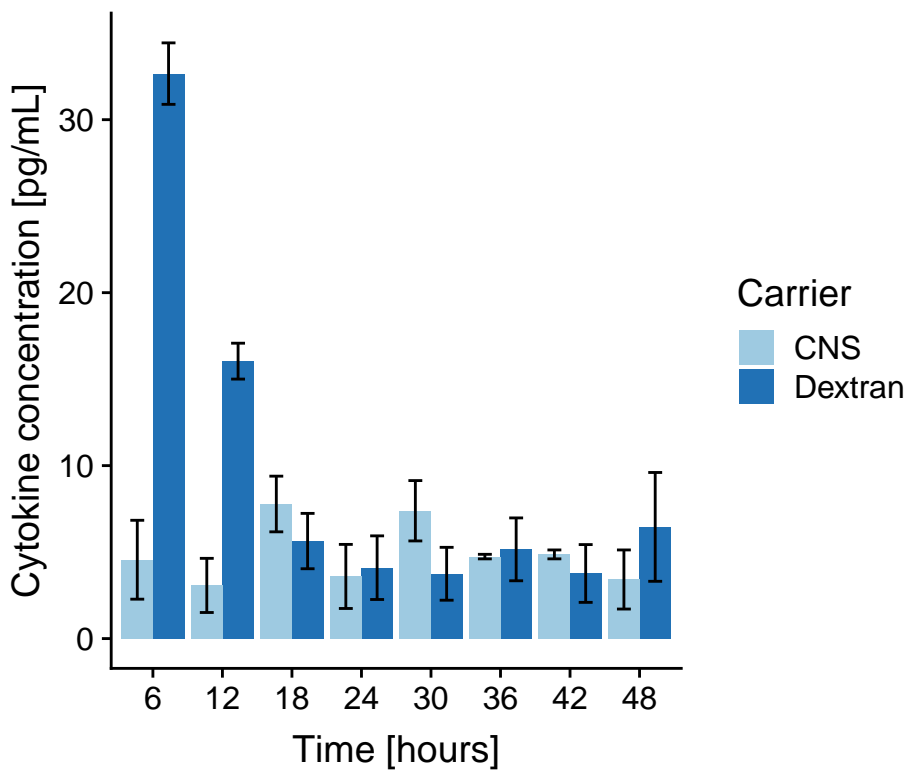

**TNF-RI**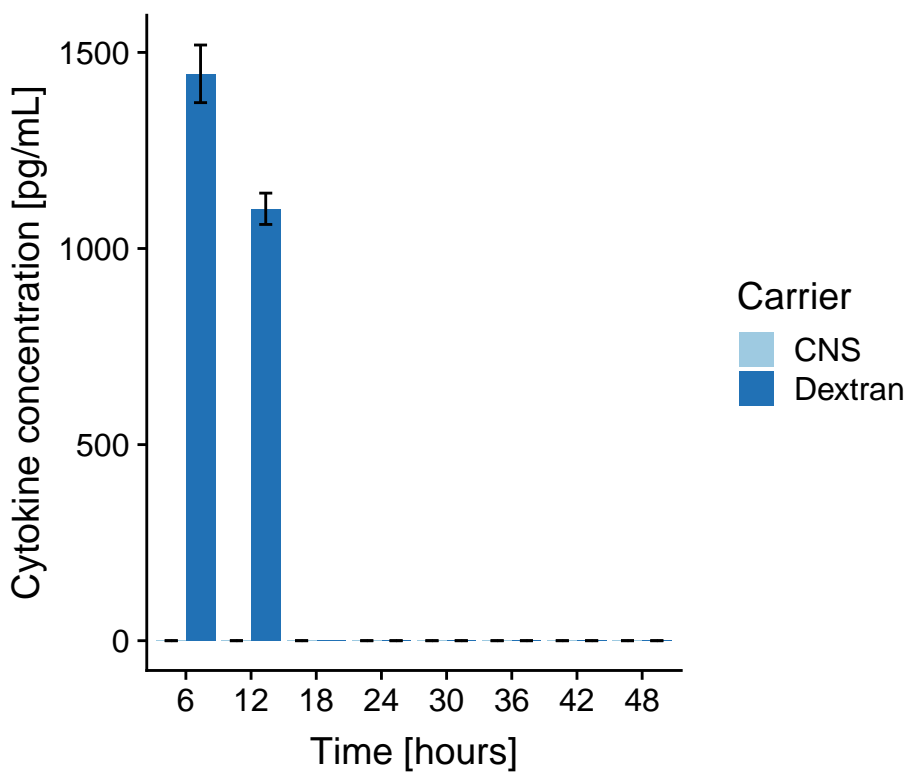**VEGF-A**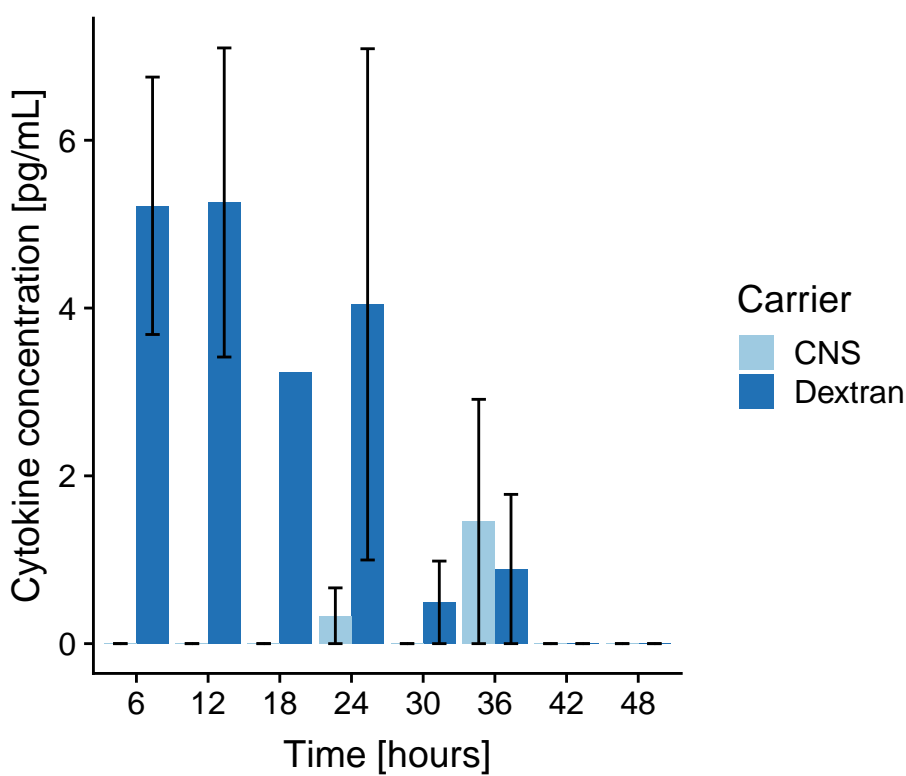**VEGF-D**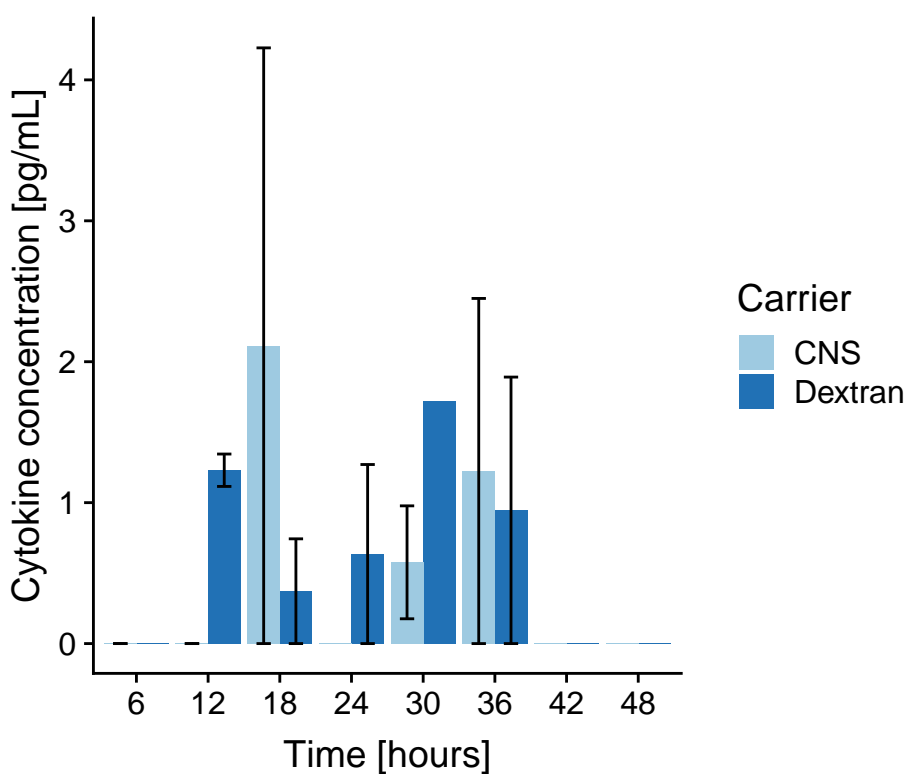

Supplement: Supp_FigureS1.pdf [file Supp_FigureS1.pdf]
