# Supplementary material for: Dextran 500 Improves Recovery of Inflammatory Markers: An In Vitro Microdialysis Study
Source: PubMed Central journal article supplement (PMC6921287; doi:10.1089/neu.2019.6513), 2019-12-11
Supplement: Supp_TableS1.pdf [file Supp_TableS1.pdf]

## Supplementary Data

SUPPLEMENTARY TABLE S1. CONCENTRATIONS OF THE 39 CYTOKINE AND CHEMOKINE STANDARDS SAMPLED FOR DURING THE *IN VITRO* TESTS

| <i>Cytokine/chemokine</i> | <i>Nominal prepared concentration (pg/mL)<sup>a</sup></i> | <i>Measured concentration in external solution at 0 h (pg/mL) average (SD)</i> | <i>Measured concentration in external solution at 24 h (pg/mL) average (SD)</i> | <i>Measured concentration in external solution at 48 h (pg/mL) average (SD)</i> |
|---------------------------|-----------------------------------------------------------|--------------------------------------------------------------------------------|---------------------------------------------------------------------------------|---------------------------------------------------------------------------------|
| BAFF                      | 108.0                                                     | 50.177 (11.341)                                                                | 47.197 (8.540)                                                                  | 48.398 (4.424)                                                                  |
| BLC/CXCL13                | 316.0                                                     | 282.571 (106.391)                                                              | 274.971 (97.543)                                                                | 262.187 (34.712)                                                                |
| BDNF                      | 87.5                                                      | 45.816 (10.955)                                                                | 24.553 (7.385)                                                                  | 19.730 (6.123)                                                                  |
| Eotaxin                   | 21.5                                                      | 32.225 (20.525)                                                                | 24.038 (12.366)                                                                 | 17.737 (7.030)                                                                  |
| Fractalkine               | 50.0                                                      | 35.104 (11.497)                                                                | 31.160 (6.610)                                                                  | 31.812 (1.558)                                                                  |
| Galectin                  | 20,831.0                                                  | 6,647.821 (3713.481)                                                           | 5,080.999 (3452.216)                                                            | 5,038.725 (4747.579)                                                            |
| G-CSF                     | 617.0                                                     | 464.514 (88.902)                                                               | 353.822 (50.532)                                                                | 243.957 (25.829)                                                                |
| GRO-alpha                 | 87.0                                                      | 51.446 (25.579)                                                                | 50.654 (23.137)                                                                 | 50.036 (19.066)                                                                 |
| IFN-alpha                 | 21.5                                                      | 8.117 (4.824)                                                                  | 7.961 (3.207)                                                                   | 8.147 (3.420)                                                                   |
| IFN-gamma                 | 477.0                                                     | 456.393 (103.740)                                                              | 364.831 (65.945)                                                                | 293.613 (78.400)                                                                |
| IL-1alpha                 | 29.0                                                      | 13.993 (5.343)                                                                 | 13.198 (5.100)                                                                  | 13.017 (2.866)                                                                  |
| IL-1beta                  | 87.5                                                      | 146.881 (40.944)                                                               | 131.799 (23.196)                                                                | 143.907 (17.585)                                                                |
| IL-1ra                    | 1398.0                                                    | 800.036 (322.415)                                                              | 746.143 (315.071)                                                               | 741.104 (266.315)                                                               |
| IL-4                      | 394.0                                                     | 403.225 (165.275)                                                              | 348.409 (79.662)                                                                | 338.300 (57.125)                                                                |
| IL-6                      | 305.0                                                     | 324.075 (173.994)                                                              | 356.508 (89.722)                                                                | 404.397 (58.409)                                                                |
| IL-8                      | 99.0                                                      | 62.724 (36.237)                                                                | 61.029 (30.667)                                                                 | 61.396 (19.943)                                                                 |
| IL-10                     | 81.0                                                      | 95.6 (35.140)                                                                  | 39.416 (13.029)                                                                 | 18.638 (6.048)                                                                  |
| IL-12p70                  | 473.0                                                     | 366.436 (131.735)                                                              | 335.956 (56.015)                                                                | 367.014 (15.020)                                                                |
| IL-17alpha                | 76.0                                                      | 88.976 (26.174)                                                                | 82.561 (18.122)                                                                 | 77.266 (10.988)                                                                 |
| IL-23                     | 700.0                                                     | 710.517 (248.357)                                                              | 389.147 (114.146)                                                               | 364.311 (81.302)                                                                |
| IP-10                     | 47.0                                                      | 72.045 (39.951)                                                                | 62.916 (33.120)                                                                 | 59.695 (27.177)                                                                 |
| M-CSF                     | 647.0                                                     | 688.654 (168.870)                                                              | 713.025 (142.048)                                                               | 768.805 (44.494)                                                                |
| MCP-1                     | 152.0                                                     | 83.141 (46.870)                                                                | 80.994 (40.623)                                                                 | 87.015 (32.790)                                                                 |
| MCP-2                     | 19.0                                                      | 11.197 (3.467)                                                                 | 10.673 (2.079)                                                                  | 10.443 (0.179)                                                                  |
| MCP-3                     | 151.0                                                     | 89.629 (37.017)                                                                | 87.233 (29.652)                                                                 | 89.745 (21.667)                                                                 |
| MDC/CCL22                 | 595.0                                                     | 300.129 (51.464)                                                               | 299.409 (58.709)                                                                | 308.758 (41.573)                                                                |
| MIP-1alpha/CCL3           | 72.5                                                      | 44.952 (26.068)                                                                | 37.378 (20.152)                                                                 | 34.353 (13.062)                                                                 |
| MIP-1beta/CCL4            | 315.0                                                     | 114.215 (64.053)                                                               | 31.468 (8.633)                                                                  | 27.836 (4.392)                                                                  |
| MIP-3alpha/CCL20          | 266.0                                                     | 512.478 (197.952)                                                              | 362.796 (88.812)                                                                | 395.118 (84.928)                                                                |
| MMP-2                     | 1,467.0                                                   | 791.681 (216.760)                                                              | 803.264 (168.265)                                                               | 1018.612 (225.953)                                                              |
| MMP-9                     | 29.5                                                      | 37.720 (7.958)                                                                 | 37.794 (6.441)                                                                  | 39.537 (3.804)                                                                  |
| RANTES                    | 34.50                                                     | 24.966 (15.245)                                                                | 23.402 (10.979)                                                                 | 23.152 (7.614)                                                                  |
| sCD40L                    | 105.0                                                     | 100.381 (20.923)                                                               | 10.471 (3.297)                                                                  | 5.034 (2.877)                                                                   |
| TGF-alpha                 | 180.0                                                     | 99.790 (28.304)                                                                | 104.240 (5.983)                                                                 | 107.166 (9.935)                                                                 |
| TIMP-1                    | 1,970.0                                                   | 1,010.039 (261.606)                                                            | 879.430 (88.291)                                                                | 1,027.716 (325.963)                                                             |
| TNF-alpha                 | 396.0                                                     | 482.134 (120.243)                                                              | 181.313 (37.661)                                                                | 86.458 (19.316)                                                                 |
| TNF-RI                    | 7,744.0                                                   | 4,199.768 (435.351)                                                            | 4,020.64 (207.650)                                                              | 4,225.314 (233.140)                                                             |
| VEGF-A                    | 236.0                                                     | 206.361 (47.149)                                                               | 208.576 (44.317)                                                                | 249.192 (19.312)                                                                |
| VEGF-D                    | 113.0                                                     | 70.246 (19.219)                                                                | 62.262 (15.665)                                                                 | 60.329 (9.511)                                                                  |

The standards were diluted to concentrations that reflect those found in the brain's extracellular fluid as shown in previous experiments from our group,<sup>10,12</sup> assuming a 20% relative recovery (RR).<sup>6</sup> Additionally, we presented the actual, measured concentrations of the external solution at time points 0, 24, and 48 h.

<sup>a</sup>Concentration prepared by assuming the weight of each cytokine (micrograms per ampoule) as supplied and specified by the manufacturer, and then diluted in an appropriate volume of external solution.

BAFF, B-cell activating factor; BDNF, brain-derived neurotrophic factor; BLC, B lymphocyte chemoattractant; CXCL13, chemokine (C-X-C motif) ligand 13; CCL, CC chemokine ligands; G-CSF, granulocyte colony-stimulating factor; GM-CSF, granulocyte-macrophage colony-stimulating factor; GRO, chemokine (C-X-C motif) ligand 1 (CXCL1); IFN, interferon; IL, interleukin; IL-1ra, interleukin-1 receptor antagonist; IP-10/IP10, interferon gamma-induced protein 10 (also known as C-X-C motif chemokine 10 [CXCL10]); MCP-1, monocyte chemoattractant protein 1 (also known as CCL2); MCP-3, monocyte chemoattractant protein-3 (also known as CCL7); MDC, macrophage-derived chemokine (also known as CCL22); MIP1 $\alpha$ , macrophage inflammatory protein 1 alpha (also known as CCL3); MIP1 $\beta$ , macrophage inflammatory protein 1 beta (also known as CCL4); PDGF, platelet-derived growth factor; RANTES, regulated on activation, normal T cell expressed and secreted (also known as CCL5); sCD40L, soluble CD40 ligand; sIL-2Ra, soluble interleukin-2 receptor antagonist; TGF, transforming growth factor; TIMP-1, tissue inhibitor of metalloproteinase 1; TNF, tumor necrosis factor; VEGF, vascular endothelial growth factor.
